# Supplementary material for: Design and screening of B–N functionalized non-fullerene acceptors for organic solar cells via multiscale computation
Source: Royal Society of Chemistry journal article supplement (doi:10.1039/d3ma00460k), 2023-01-01
Supplement: d3ma00460k1.pdf [file d3ma00460k1.pdf]

**Supporting Information:**

**Design and Screening of B-N Functionalized  
Non-fullerene Acceptors for Organic Solar Cells  
via Multiscale Computation**

Rudranarayan Khatua and Anirban Mondal\*

*Department of Chemistry, Indian Institute of Technology Gandhinagar, Gujarat, 382355,  
India*

E-mail: [amondal@iitgn.ac.in](mailto:amondal@iitgn.ac.in)

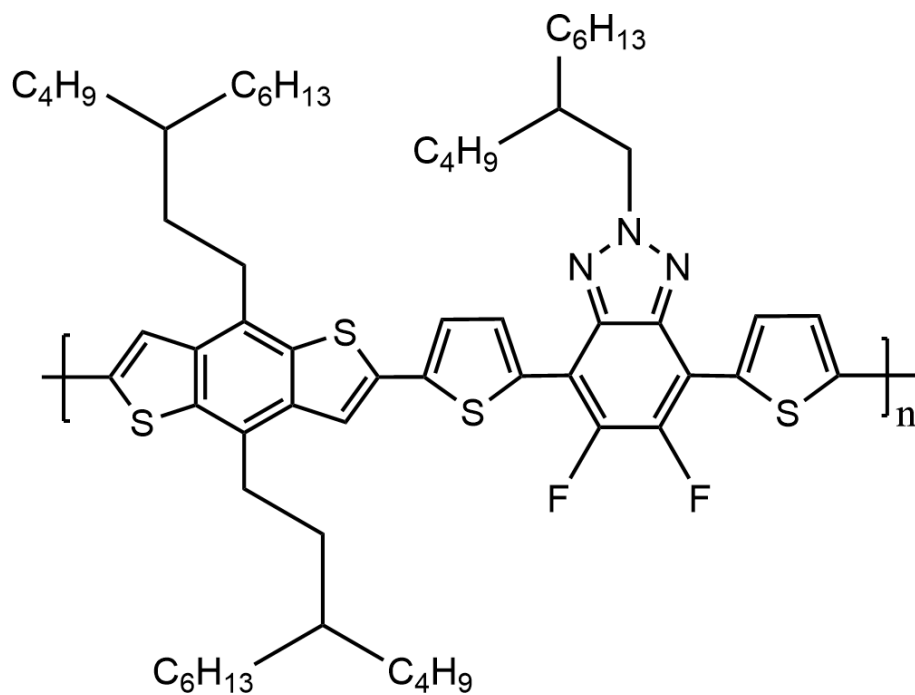

## FTAZ

Figure S1: Chemical structure of the FTAZ donor. Optimization of the donor polymer was performed at B3LYP/6-31G(d,p) level of theory considering one monomer unit.

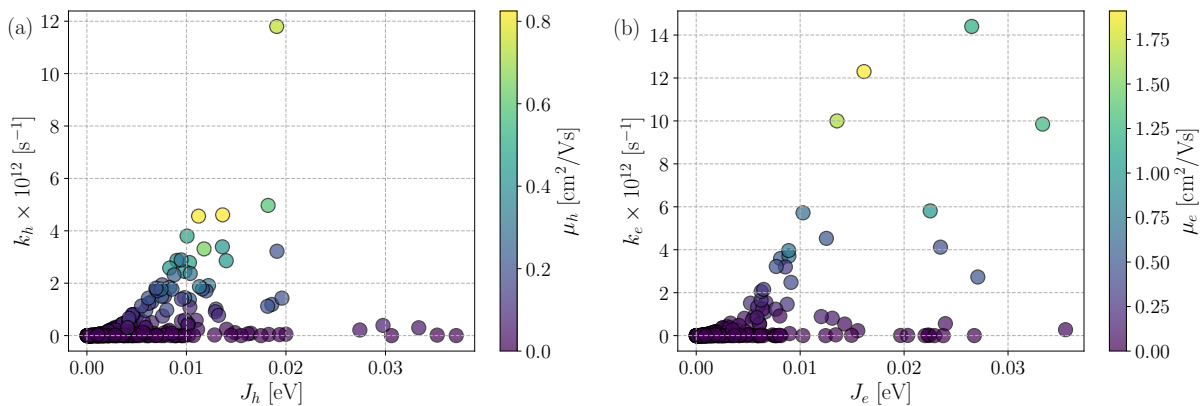

Figure S2: Correlation plot between the rate of charge transfer ( $k_h / k_e$ ) and electronic coupling ( $J_h / J_e$ ) for all the investigated eight thiophene systems: (a) holes and (b) electrons. The color of each point represents the charge carrier mobility ( $\mu_h / \mu_e$ ) value.

**Table S1: Comparison between predicted absorption wavelength ( $\lambda$ ) and electron mobility ( $\mu$ ) with experimental measurements.  $\lambda$  values are obtained at B3LYP/6-31G(d,p) level of theory.  $\mu$  was computed following the protocol described in Section 2.2 of the main manuscript.**

| Compounds | $\lambda_{\text{sim}} [\text{nm}]$ | $\lambda_{\text{exp}} [\text{nm}]$ | $\mu_e (\text{sim}) (\text{cm}^2 \text{V}^{-1}\text{s}^{-1})$ | $\mu_e (\text{exp}) (\text{cm}^2 \text{V}^{-1}\text{s}^{-1})$ |
|-----------|------------------------------------|------------------------------------|---------------------------------------------------------------|---------------------------------------------------------------|
| INIC3     | 736                                | 710 <sup>S1</sup>                  | $3.45 \times 10^{-2}$                                         | $1.70 \times 10^{-4}$ <sup>S1</sup>                           |
| BCDT-4F   | 756                                | 733 <sup>S2</sup>                  | $4.89 \times 10^{-2}$                                         | $2.09 \times 10^{-4}$ <sup>S2</sup>                           |
| BCDT-4Cl  | 769                                | 748 <sup>S2</sup>                  | $8.50 \times 10^{-2}$                                         | $3.54 \times 10^{-4}$ <sup>S2</sup>                           |

Table S2 of the supplementary information is provided in a separate excel sheet.

## References

- (S1) Dai, S.; Zhao, F.; Zhang, Q.; Lau, T.-K.; Li, T.; Liu, K.; Ling, Q.; Wang, C.; Lu, X.; You, W., et al. Fused nonacyclic electron acceptors for efficient polymer solar cells. *J. Am. Chem. Soc.* **2017**, *139*, 1336–1343.
- (S2) He, C.; Li, Y.; Li, S.; Yu, Z.-P.; Li, Y.; Lu, X.; Shi, M.; Li, C.-Z.; Chen, H. Near-infrared electron acceptors with unfused architecture for efficient organic solar cells. *ACS applied materials & interfaces* **2020**, *12*, 16700–16706.
