# Supplementary material for: Design and screening of B–N functionalized non-fullerene acceptors for organic solar cells via multiscale computation
Source: Royal Society of Chemistry journal article supplement (doi:10.1039/d3ma00460k), 2023-01-01
Supplement: d3ma00460k2.xlsx [file d3ma00460k2.xlsx]

## Sheet: Sheet1
Compounds	HOMO (eV)	LUMO (eV)	LUMO+1 (eV)	Diff_L-L+1	H-L Gap (eV)	λ(nm)	E_S(eV)	f	E_B(eV)	Q20	V_OC(V)
A1-D1-A1	-5.455	-3.444	-3.258	0.186	2.011	735.72	1.685	3.0323	0.326	136.767	0.852
A2-D1-A2	-5.229	-2.971	-2.722	0.249	2.258	645.34	1.921	2.952	0.337	62.8142	1.325
A3-D1-A3	-5.546	-3.657	-3.496	0.161	1.889	780.99	1.587	2.9153	0.302	110.013	0.639
A4-D1-A4	-5.452	-3.478	-3.275	0.203	1.974	746.3	1.661	3.1937	0.313	119.534	0.818
A5-D1-A5	-5.268	-3.238	-3.142	0.096	2.03	739.77	1.676	1.9837	0.354	63.1404	1.058
A6-D1-A6	-5.368	-3.402	-3.315	0.087	1.966	766.29	1.618	1.8609	0.348	106.682	0.894
A7-D1-A7	-5.257	-3.239	-3.152	0.087	2.018	749.14	1.655	2.0604	0.363	52.5544	1.057
A8-D1-A8	-5.344	-3.281	-3.162	0.119	2.063	718.29	1.726	2.2338	0.337	101.195	1.015
A9-D1-A9	-5.775	-3.901	-3.751	0.15	1.874	799.35	1.55	2.7068	0.324	264.549	0.395
A10-D1-A10	-5.622	-3.824	-3.75	0.074	1.798	837.37	1.481	1.7326	0.317	195.342	0.472
A11-D1-A11	-5.358	-3.111	-2.841	0.27	2.247	654.77	1.893	3.032	0.354	92.2882	1.185
A12-D1-A12	-5.325	-3.136	-2.911	0.225	2.189	659.6	1.88	3.1175	0.309	182.56	1.16
A1-D2-A1	-5.469	-3.455	-3.268	0.187	2.014	735.29	1.686	3.0525	0.328	134.785	0.841
A2-D2-A2	-5.241	-2.98	-2.73	0.25	2.261	645.05	1.922	2.9781	0.339	61.3806	1.316
A3-D2-A3	-5.561	-3.668	-3.507	0.161	1.893	780.49	1.588	2.9337	0.305	107.734	0.628
A4-D2-A4	-5.466	-3.488	-3.285	0.203	1.978	745.84	1.662	3.2159	0.316	117.393	0.808
A5-D2-A5	-5.28	-3.245	-3.15	0.095	2.035	739.43	1.677	1.9943	0.358	61.5971	1.051
A6-D2-A6	-5.382	-3.411	-3.323	0.088	1.971	765.94	1.619	1.8695	0.352	104.558	0.885
A7-D2-A7	-5.27	-3.236	-3.141	0.095	2.034	744.19	1.666	2.0698	0.368	46.0776	1.06
A8-D2-A8	-5.358	-3.289	-3.171	0.118	2.069	717.29	1.727	2.2479	0.342	99.3118	1.007
A9-D2-A9	-5.793	-3.914	-3.764	0.15	1.879	799.18	1.551	2.7199	0.328	262.138	0.382
A10-D2-A10	-5.63	-3.834	-3.761	0.073	1.796	836.92	1.481	1.7392	0.315	191.775	0.462
A11-D2-A11	-5.371	-3.122	-2.851	0.271	2.249	654.43	1.894	3.0581	0.355	90.4543	1.174
A12-D2-A12	-5.339	-3.146	-2.92	0.226	2.193	659.25	1.881	3.142	0.312	180.224	1.15
A1-D3-A1	-4.578	-3.139	-2.919	0.22	1.439	1076.04	1.152	2.6434	0.287	202.324	1.157
A2-D3-A2	-4.294	-2.623	-2.362	0.261	1.671	1025.82	1.209	2.1966	0.462	115.648	1.673
A3-D3-A3	-4.678	-3.365	-3.151	0.214	1.313	1165.39	1.064	2.7396	0.249	180.134	0.931
A4-D3-A4	-4.586	-3.169	-2.92	0.249	1.417	1081.78	1.146	2.8764	0.271	186.587	1.127
A5-D3-A5	-4.379	-2.961	-2.856	0.105	1.418	1141.42	1.086	1.528	0.332	128.193	1.335
A6-D3-A6	-4.483	-3.125	-3.023	0.102	1.358	1198.58	1.034	1.5005	0.324	172.366	1.171
A7-D3-A7	-4.377	-2.977	-2.881	0.096	1.4	1163.83	1.065	1.538	0.335	121.719	1.319
A8-D3-A8	-4.446	-2.978	-2.852	0.126	1.468	1077.31	1.151	1.682	0.317	163.7	1.318
A9-D3-A9	-4.913	-3.605	-3.426	0.179	1.308	1217.69	1.018	2.0968	0.29	333.019	0.691
A10-D3-A10	-4.749	-3.553	-3.455	0.098	1.196	1363.45	0.909	1.5162	0.287	262.811	0.743
A11-D3-A11	-4.428	-2.76	-2.471	0.289	1.668	921.31	1.346	2.5542	0.322	146.496	1.536
A12-D3-A12	-4.427	-2.804	-2.565	0.239	1.623	927.17	1.3372	2.508	0.2858	238.006	1.492
A1-D4-A1	-4.608	-3.16	-2.941	0.219	1.448	1074.67	1.154	2.6597	0.294	198.17	1.136
A2-D4-A2	-4.323	-2.643	-2.383	0.26	1.68	909.55	1.363	2.4774	0.317	112.461	1.653
A3-D4-A3	-4.709	-3.387	-3.175	0.212	1.322	1163.97	1.065	2.7553	0.257	174.935	0.909
A4-D4-A4	-4.617	-3.19	-2.944	0.246	1.427	1080.38	1.148	2.8957	0.279	182.105	1.106
A5-D4-A5	-4.407	-2.979	-2.874	0.105	1.428	1140.03	1.088	1.5328	0.34	124.385	1.317
A6-D4-A6	-4.512	-3.144	-3.042	0.102	1.368	1197.23	1.036	1.5044	0.332	167.63	1.152
A7-D4-A7	-4.404	-2.981	-2.877	0.104	1.423	1150.82	1.077	1.5393	0.346	112.009	1.315
A8-D4-A8	-4.475	-2.998	-2.872	0.126	1.477	1076.12	1.152	1.6874	0.325	159.558	1.298
A9-D4-A9	-4.947	-3.628	-3.45	0.178	1.319	1216.42	1.019	2.1063	0.3	328.56	0.668
A10-D4-A10	-4.781	-3.574	-3.476	0.098	1.207	1362.02	0.91	1.5192	0.297	255.881	0.722
A11-D4-A11	-4.458	-2.782	-2.493	0.289	1.676	920.14	1.347	2.5769	0.329	142.951	1.514
A12-D4-A12	-4.387	-2.832	-2.597	0.235	1.555	925.76	1.339	2.5286	0.216	233.719	1.464
A1-D5-A1	-5.367	-3.424	-3.3	0.124	1.943	763.57	1.624	3.2236	0.319	157.859	0.872
A2-D5-A2	-5.157	-2.965	-2.792	0.173	2.192	666.43	1.86	3.2805	0.332	73.4274	1.331
A3-D5-A3	-5.446	-3.636	-3.529	0.107	1.81	819.64	1.513	3.0627	0.297	133.06	0.66
A4-D5-A4	-5.367	-3.456	-3.321	0.135	1.911	774.79	1.6	3.409	0.311	137.973	0.84
A5-D5-A5	-5.195	-3.235	-3.17	0.065	1.96	764.58	1.622	2.09	0.338	71.9431	1.061
A6-D5-A6	-5.286	-3.396	-3.338	0.058	1.89	795.65	1.558	1.9363	0.332	121.567	0.9
A7-D5-A7	-5.185	-3.237	-3.178	0.059	1.948	773.13	1.604	2.1488	0.344	60.8473	1.059
A8-D5-A8	-5.264	-3.272	-3.191	0.081	1.992	743.56	1.667	2.3614	0.325	115.221	1.024
A9-D5-A9	-5.659	-3.868	-3.767	0.101	1.791	841.47	1.473	2.7641	0.318	307.999	0.428
A10-D5-A10	-5.515	-3.81	-3.761	0.049	1.705	881.14	1.407	1.7656	0.298	222.275	0.486
A11-D5-A11	-5.272	-3.096	-2.911	0.185	2.176	679.4	1.825	3.3442	0.351	109.505	1.2
A12-D5-A12	-5.255	-3.123	-2.968	0.155	2.132	676.9	1.832	3.4347	0.3	209.687	1.173
A1-D6-A1	-5.294	-3.424	-3.282	0.142	1.87	797.01	1.556	3.1435	0.314	161.021	0.872
A2-D6-A2	-5.084	-2.977	-2.782	0.195	2.107	696.84	1.779	3.1465	0.328	79.1805	1.319
A3-D6-A3	-5.375	-3.631	-3.51	0.121	1.744	856.18	1.448	2.9849	0.296	128.02	0.665
A4-D6-A4	-5.295	-3.455	-3.303	0.152	1.84	808.97	1.533	3.3071	0.307	139.876	0.841
A5-D6-A5	-5.121	-3.229	-3.152	0.077	1.892	795.71	1.558	2.137	0.334	72.3673	1.067
A6-D6-A6	-5.223	-3.387	-3.319	0.068	1.836	828.1	1.497	1.9772	0.339	124.333	0.909
A7-D6-A7	-5.111	-3.23	-3.16	0.07	1.881	804.36	1.541	2.1962	0.34	60.9306	1.066
A8-D6-A8	-5.19	-3.269	-3.173	0.096	1.921	774.28	1.601	2.3917	0.32	117.535	1.027
A9-D6-A9	-5.588	-3.86	-3.745	0.115	1.728	877.72	1.413	2.7443	0.315	315.752	0.436
A10-D6-A10	-5.444	-3.796	-3.74	0.056	1.648	918.64	1.35	1.7914	0.298	231.526	0.5
A11-D6-A11	-5.199	-3.109	-2.901	0.208	2.09	710.41	1.745	3.194	0.345	116.152	1.187
A12-D6-A12	-5.184	-3.132	-2.957	0.175	2.052	706.84	1.754	3.3114	0.298	215.993	1.164
A1-D7-A1	-5.349	-3.414	-3.27	0.144	1.935	767.08	1.616	3.3594	0.319	133.362	0.882
A2-D7-A2	-5.13	-2.97	-2.773	0.197	2.16	676.54	1.833	3.3351	0.327	57.5355	1.326
A3-D7-A3	-5.427	-3.616	-3.493	0.123	1.811	816.88	1.518	3.2169	0.293	129.58	0.68
A4-D7-A4	-5.347	-3.445	-3.291	0.154	1.902	777.96	1.594	3.5166	0.308	119.922	0.851
A5-D7-A5	-5.174	-3.22	-3.141	0.079	1.954	769.59	1.611	2.269	0.343	61.7421	1.076
A6-D7-A6	-5.268	-3.376	-3.306	0.07	1.892	798.01	1.554	2.1041	0.338	104.501	0.92
A7-D7-A7	-5.165	-3.223	-3.15	0.073	1.942	778.7	1.592	2.3278	0.35	50.9892	1.073
A8-D7-A8	-5.243	-3.257	-3.157	0.1	1.986	747.77	1.658	2.5635	0.328	98.3954	1.039
A9-D7-A9	-5.648	-3.847	-3.73	0.117	1.801	836.45	1.482	2.9419	0.319	256.228	0.449
A10-D7-A10	-5.503	-3.782	-3.725	0.057	1.721	877.05	1.414	1.908	0.307	191.242	0.514
A11-D7-A11	-5.25	-3.103	-2.893	0.21	2.147	687.21	1.804	3.3953	0.343	86.6806	1.193
A12-D7-A12	-5.227	-3.126	-2.947	0.179	2.101	688.7	1.8	3.4886	0.301	167.2	1.17
A1-D8-A1	-4.537	-3.175	-3.024	0.151	1.362	1162.51	1.066	2.8176	0.296	229.683	1.121
A2-D8-A2	-4.284	-2.689	-2.511	0.178	1.595	968.7	1.28	2.693	0.315	134.769	1.607
A3-D8-A3	-4.629	-3.397	-3.25	0.147	1.232	1277.03	0.971	2.9266	0.261	210.83	0.899
A4-D8-A4	-4.546	-3.203	-3.035	0.168	1.343	1171.75	1.058	3.066	0.285	209.694	1.093
A5-D8-A5	-4.355	-3.012	-2.938	0.074	1.343	1218.17	1.018	1.6448	0.325	138.313	1.284
A6-D8-A6	-4.45	-3.172	-3.101	0.071	1.278	1290.07	0.961	1.6149	0.317	192.587	1.124
A7-D8-A7	-4.352	-3.025	-2.958	0.067	1.327	1240.87	0.999	1.6445	0.328	130.214	1.271
A8-D8-A8	-4.417	-3.028	-2.938	0.09	1.389	1153.13	1.075	1.8179	0.314	182.009	1.268
A9-D8-A9	-4.844	-3.624	-3.494	0.13	1.22	1340.15	0.925	2.2699	0.295	392.178	0.672
A10-D8-A10	-4.693	-3.588	-3.518	0.07	1.105	1498.19	0.828	1.6508	0.277	305.596	0.708
A11-D8-A11	-4.401	-2.816	-2.619	0.197	1.585	990.18	1.252	2.7965	0.333	174.004	1.48
A12-D8-A12	-4.405	-2.86	-2.697	0.163	1.545	982.7	1.262	2.7089	0.283	276.435	1.436
A1-D9-A1	-4.655	-3.196	-3.057	0.139	1.459	1077.37	1.151	2.736	0.308	224.246	1.1
A2-D9-A2	-4.407	-2.712	-2.541	0.171	1.695	907.98	1.365	2.6381	0.33	131.178	1.584
A3-D9-A3	-4.745	-3.385	-3.283	0.102	1.36	1178.49	1.052	2.8087	0.308	195.47	0.911
A4-D9-A4	-4.664	-3.225	-3.07	0.155	1.439	1086.67	1.141	2.9753	0.298	204.449	1.071
A5-D9-A5	-4.472	-3.027	-2.958	0.069	1.445	1120.25	1.107	1.6157	0.338	134.978	1.269
A6-D9-A6	-4.567	-3.187	-3.121	0.066	1.38	1181.55	1.049	1.5653	0.331	186.752	1.109
A7-D9-A7	-4.468	-3.039	-2.975	0.064	1.429	1138.95	1.089	1.6184	0.34	126.938	1.257
A8-D9-A8	-4.537	-3.048	-2.963	0.085	1.489	1065.6	1.163	1.8035	0.326	177.821	1.248
A9-D9-A9	-4.964	-3.642	-3.523	0.119	1.322	1225.49	1.012	2.2362	0.31	381.796	0.654
A10-D9-A10	-4.812	-3.6	-3.538	0.062	1.212	1356.94	0.914	1.5667	0.298	294.455	0.696
A11-D9-A11	-4.527	-2.84	-2.654	0.186	1.687	924.86	1.341	2.7391	0.346	169.729	1.456
A12-D9-A12	-4.529	-2.879	-2.724	0.155	1.65	919.83	1.348	2.6764	0.302	270.272	1.417
A1-D10-A1	-4.676	-3.157	-3.02	0.137	1.519	1007.41	1.231	2.8073	0.288	186.932	1.139
A2-D10-A2	-4.423	-2.677	-2.508	0.169	1.746	858.28	1.445	2.8096	0.301	105.001	1.619
A3-D10-A3	-4.777	-3.374	-3.246	0.128	1.403	1082.75	1.145	2.8474	0.258	184.296	0.922
A4-D10-A4	-4.68	-3.184	-3.035	0.149	1.496	1017.09	1.219	3.0114	0.277	172.423	1.112
A5-D10-A5	-4.495	-2.999	-2.931	0.068	1.496	1057.75	1.172	1.6598	0.324	110.247	1.297
A6-D10-A6	-4.594	-3.158	-3.093	0.065	1.436	1108.75	1.118	1.6032	0.318	158.328	1.138
A7-D10-A7	-4.493	-3.015	-2.952	0.063	1.478	1076.47	1.152	1.676	0.326	101.533	1.281
A8-D10-A8	-4.558	-3.009	-2.926	0.083	1.549	1003.45	1.236	1.806	0.313	148.493	1.287
A9-D10-A9	-4.992	-3.603	-3.493	0.11	1.389	1139.11	1.088	2.1562	0.301	322.534	0.693
A10-D10-A10	-4.846	-3.574	-3.515	0.059	1.272	1257.48	0.986	1.5829	0.286	257.272	0.722
A11-D10-A11	-4.54	-2.802	-2.618	0.184	1.738	872.72	1.421	2.8338	0.317	137.124	1.494
A12-D10-A12	-4.552	-2.847	-2.693	0.154	1.705	872.03	1.422	2.8491	0.283	225.449	1.449
FTAZ (Donor)	-4.983	-2.239
